# Supplementary material
Source: publisher figshare collection journal article supplement (https://tandf.figshare.com/articles/dataset/_/3443405)
Supplement: Supplementary file 3 [file 2]

The skeleton of the manus of *Myiodon darwinii* Owen (Tardigrada, Mylodontidae) and its phylogenetic implications

JOSÉ A. HARO, ADAN A. TAUBER, and JERÓNIMO M. KRAPOVICKAS

Journal of Vertebrate Paleontology

SUPPLEMENTARY DATA 5

## DATA MATRIX

The following data matrix is meant to be added to those in Gaudin (2004) and Rincón et al. (2015) to form a larger data matrix.

**Abbreviations**— **P**, polymorphic, both states 0 and 1 present.

|                                                 | 10         | 20         | 30         | 37       |
|-------------------------------------------------|------------|------------|------------|----------|
| <i>Megalonyx jeffersoni</i>                     | 000--1-0-0 | 01--1-0P11 | 00-0P0--00 | 0-0--P-  |
| <i>Hapalops</i>                                 | 000--1-0X- | -----0--1  | -----0---- | -----    |
| <i>Mionothropus cartellei</i>                   | 0-0--1-0-0 | 00-----011 | -0-----    | -1-----  |
| <i>Megatherium americanum</i>                   | 100P0P---X | X--X--0-00 | ---01----- | -100---  |
| <i>Catonyx</i>                                  | 1000-----0 | P---P--0P- | -----0--0P | --00-0P  |
| <i>Scelidotherium</i>                           | 0000PP0000 | P000000000 | 000000000- | 0P00000  |
| <i>Pseudoprepotherium confusum</i>              | 0000-00-0- | -----      | 0-0010-100 | 000----  |
| <i>Mylodon darwinii</i>                         | 1111011111 | 1111011001 | 1111111101 | 11111111 |
| <i>Glossotherium robustum</i>                   | 11110--1-0 | 000-001111 | -1-1P-10-1 | -11-1--  |
| <i>Paramylodon harlani</i>                      | 1111P11110 | 00000-011- | 110-111011 | 1011-00  |
| <i>Mylodonopsis ibseni</i>                      | -11-1--1-1 | 111-11---0 | -----1--   | -----1   |
| <i>Glossotherium garbanii</i>                   | --1----0-- | 010-0-0--- | --0-1---00 | -----0-  |
| <i>Simomylodon uccasamamensis</i>               | 10011----- | --0-1----- | --110-011- | -1--0--  |
| <i>Thinobadistes segnisi</i>                    | 100-001--0 | 0-P-P-0--- | -0-----    | -----    |
| <i>Ocnotherium giganteum</i>                    | -00-----   | 1-1-1-0--- | -----      | -----    |
| Holotype of <i>Pseudolestodon hexaspondylus</i> | 11-----    | 0-----     | ----0----- | ---0-1-  |
| UF 10922 (" <i>G. chapadmalensis</i> ")         | -11-----   | ---10-0--- | -----      | -----    |
