# Supplementary material
Source: publisher figshare collection journal article supplement (https://tandf.figshare.com/articles/dataset/_/3443405)
Supplement: Supplementary file 5 [file 2]

The skeleton of the manus of *Mylodon darwinii* Owen (Tardigrada, Mylodontidae) and its  
phylogenetic implications

JOSÉ A. HARO, ADAN A. TAUBER, and JERÓNIMO M. KRAPOVICKAS

Journal of Vertebrate Paleontology

SUPPLEMENTARY DATA 1

TABLE S1. Selected measurements of described bones. Measurements are of actual bones or bone fragments, not estimated. **Abbreviations:** **I**, incomplete; **L**, left bone; **R**, right bone.

|                                                                                                                                                                      |                                 |
|----------------------------------------------------------------------------------------------------------------------------------------------------------------------|---------------------------------|
| <b>Scaphoid</b>                                                                                                                                                      |                                 |
| Maximal diameter of the proximal articular surface                                                                                                                   | 73.1 mm (L);<br>65.8 mm (R)     |
| Maximal length from the border of the articular facet for the radius to the border of the articular facet for the trapezium-metacarpal I                             | 69.1 mm (L)                     |
| Proximodistal length from the proximal articular surface to apex of distal process, measured perpendicular to the proximal articular surface                         | 36.2 mm (L);<br>38.6 mm (R)     |
| Maximal dorsopalmar depth, measured perpendicular to the line connecting the mediopalmar and lateropalmar corners                                                    | 61.7 mm (L);<br>56.1 mm (RI)    |
| Maximal proximodistal length at the dorsal surface                                                                                                                   | 36.1 mm (LI);<br>39.9 mm (RI)   |
| Proximodistal length at mid-length of the dorsal surface                                                                                                             | 18.2 mm (L)<br>and 18.3 mm (RI) |
| Maximal mediolateral width                                                                                                                                           | 67.1 mm (L);<br>66.7 mm (R)     |
| Width of trapezial process in transverse plane                                                                                                                       | 18 mm (L)                       |
| Length of trapezial process in transverse plane                                                                                                                      | 24.1 mm (L)                     |
| <b>Lunar</b>                                                                                                                                                         |                                 |
| Maximal proximodistal length from the articular facet for the radius to the articular facet for the unciform, measured along the dorsal surface                      | 49.1 mm (L);<br>49.3 mm (R)     |
| Maximal proximodistal length of the dorsal surface, from the articular facet for the radius to the articular facet for the unciform (not including articular facets) | 25.9 mm (L);<br>25.2 mm (R)     |
| Maximal width, measured along the proximal articular surface for the radius                                                                                          | 65.5 mm (L)                     |
| Maximal dorsopalmar length of the articular surface for the cuneiform                                                                                                | 36.1 mm (L)                     |
| Chord length of the lateral border of the bone                                                                                                                       | 11.4 mm (L)                     |
| Chord length of the dorsal border of the articular surface for the magnum                                                                                            | 25 mm (L);<br>24 mm (R)         |
| Chord length of the medial border in dorsal view, between articular facets for radius and magnum                                                                     | 21 mm (L);<br>22.6 mm (R)       |
| Chord length of the dorsal border of the unciform articular facet                                                                                                    | 29 mm (L, R)                    |
| Chord length of the dorsal border of the cuneiform articular facet                                                                                                   | 28 mm (L)                       |
| Angle formed by the articular facets for magnum and unciform at the mid-point of their contact                                                                       | ca. 133° (L, R)                 |
| Width of dorsal border of proximal articular surface                                                                                                                 | 62.3 (L)                        |
| Width of palmar end of proximal articular surface                                                                                                                    | 25.4 (L)                        |
| Maximal width of palmar half of unciform facet                                                                                                                       | 37.4 mm (L)                     |
| <b>Cuneiform</b>                                                                                                                                                     |                                 |
| Maximal diameter (dorsopalmar) of articular surface for ulna                                                                                                         | 53 mm (L)                       |
| Minimal diameter (mediolateral) of articular surface for ulna                                                                                                        | 45 mm (L)                       |

|                                                                                                         |                               |
|---------------------------------------------------------------------------------------------------------|-------------------------------|
| Angle formed between articular facets for ulna and pisiform                                             | ca. 100° (L)                  |
| Maximal mediolateral width                                                                              | 73.6 mm (L)                   |
| Maximal proximodistal length, measured perpendicular to the articular surface for the ulna              | 61.4 mm (L)                   |
| Maximal dorsopalmar length of the ulnar articular surface, measured normal to the dorsolateral surface  | 50.6 mm (L)                   |
| Maximal dorsopalmar depth of the bone, measured parallel to the plane of the proximal articular surface | 57.4 mm (L)                   |
| <hr/>                                                                                                   |                               |
| Pisiform                                                                                                |                               |
| Maximal length                                                                                          | 50.8 mm (L)                   |
| Maximal width, perpendicular to the Maximal length                                                      | 31.6 mm (L)                   |
| Maximal thickness, perpendicular to the cuneiform facet                                                 | 21.3 mm (L)                   |
| <hr/>                                                                                                   |                               |
| Trapezoid                                                                                               |                               |
| Maximal dorsopalmar depth                                                                               | 40.7 mm (L);<br>40.2 mm (R)   |
| Maximal length of the dorsal surface perpendicular to the main articular facet for the scaphoid         | 42.7 mm (L)                   |
| Minimal diameter of the dorsal surface                                                                  | 28.6 mm (L);<br>29.1 mm (R)   |
| Maximal proximodistal length of the dorsal surface                                                      | 35 mm (L)                     |
| Maximal proximodistal length of the dorsal facet for the magnum                                         | 20.1 mm (L)                   |
| Maximal mediolateral width of the dorsal surface                                                        | 34.6 mm (L);<br>35.4 mm (R)   |
| Maximal dorsopalmar depth of scaphoid facet                                                             | 32 mm (L);<br>32.5 mm (R)     |
| Maximal mediolateral width of scaphoid facet                                                            | 23 mm (L, R)                  |
| <hr/>                                                                                                   |                               |
| Magnum                                                                                                  |                               |
| Maximal dorsopalmar length of the distal surface                                                        | 64 mm (L);<br>59 mm (RI)      |
| Maximal mediolateral width of the dorsal surface                                                        | 44.7 mm (L);<br>41.8 mm (R)   |
| Maximal proximodistal length                                                                            | 61.4 mm (L);<br>62.7 mm (R)   |
| Mediolateral width of the palmar surface, perpendicular to the dorsal facet for the unciform            | 34.5 mm (L);<br>33.9 mm (R)   |
| Proximodistal length perpendicular to the palmar part of the lateral facet for metacarpal III           | 12.6 mm (L);<br>12.8 mm (R)   |
| Dorsopalmar depth of the ridge located between the facets for scaphoid and lunar                        | 32.6 mm (L);<br>31.1 mm (R)   |
| Angle between articular facet for metacarpal II and palmar articular facet for trapezoid                | ca. 132° (L);<br>ca. 129° (R) |
| Maximal dorsopalmar depth                                                                               | 65 mm (L)                     |

|                                                                                                                                                                             |                               |
|-----------------------------------------------------------------------------------------------------------------------------------------------------------------------------|-------------------------------|
| Maximal dorsopalmar depth of proximal articular surface                                                                                                                     | 45 mm (L);<br>41.9 mm (R)     |
| Angle between dorsal articular facet for trapezoid and medial articular facet for metacarpal III                                                                            | ca. 96° (L);<br>ca. 105° (R)  |
| Angle between articular facet for metacarpal II and palmar part of lateral articular facet for metacarpal III                                                               | ca. 119° (L);<br>ca. 116° (R) |
| Mediolateral width of dorsal end of scaphoid facet                                                                                                                          | 16.3 mm (L);<br>17.5 mm (R)   |
| Mediolateral width of palmar end of scaphoid facet                                                                                                                          | 19.5 mm (L);<br>18.7 mm (R)   |
| <hr/> <b>Unciform</b> <hr/>                                                                                                                                                 |                               |
| Angle between facet for metacarpal IV and dorsal facet for metacarpal III                                                                                                   | ca. 118° (L, R)               |
| Angle between facet for metacarpal IV and palmar facet for metacarpal III                                                                                                   | ca. 114° (L);<br>ca. 116° (R) |
| Angle between facets for metacarpal IV and metacarpal V                                                                                                                     | ca. 129° (L);<br>ca. 132° (R) |
| Maximal mediolateral width, measured from the most medial point of the articular facet for metacarpal III to the most lateral point of the articular facet for metacarpal V | 61.5 (L); 65.5 mm (R)         |
| Maximal proximodistal length, from the apex of the proximal process to the palmar half of the facet for metacarpal IV, perpendicular to the latter                          | 57.8 mm (L)                   |
| Maximal dorsopalmar depth of the metacarpal IV facet                                                                                                                        | 52 mm (LI);<br>52.7 mm (RI)   |
| Dorsopalmar depth of lateral part of cuneiform facet                                                                                                                        | 35.8 mm (L)                   |
| Mediolateral width of cuneiform facet                                                                                                                                       | 42.5 mm (L)                   |
| Mediolateral width of dorsal part of lunar articular facet                                                                                                                  | 25.5 mm (L)                   |
| Mediolateral width of palmar part of lunar articular facet                                                                                                                  | 33.8 mm (L)                   |
| Mediolateral width of dorsal part of metacarpal V articular facet                                                                                                           | 20.2 mm (L)                   |
| Mediolateral width of palmar part of metacarpal V articular facet                                                                                                           | 27.7 mm (L)                   |
| Angle between main planes of dorsal facets for magnum and metacarpal III.                                                                                                   | ca. 126° (L)                  |
| <hr/> <b>Trapezium-Metacarpal I</b> <hr/>                                                                                                                                   |                               |
| Maximal proximodistal length                                                                                                                                                | 40.4 mm (L)                   |
| Axioabaxial length of the proximal end                                                                                                                                      | 39.1 mm (L)                   |
| Angle between trapezial and metacarpal arms.                                                                                                                                | ca. 70° (L)                   |
| Angle between facets for metacarpal II and scaphoid.                                                                                                                        | ca. 77° (L)                   |
| <hr/> <b>Metacarpal II</b> <hr/>                                                                                                                                            |                               |
| Maximal proximodistal length                                                                                                                                                | 78.6 mm (L);<br>79.2 mm (R)   |
| Maximal chord length of the carina of the distal articular surface (= Maximal diameter of the distal end)                                                                   | 53.1 mm (L);<br>53.8 mm (R)   |
| Minimal dorsopalmar depth of the shaft                                                                                                                                      | 30 mm (L, R)                  |

|                                                                                         |                             |
|-----------------------------------------------------------------------------------------|-----------------------------|
| Axioabaxial width of the distal articular facet                                         | 29.7 mm (L);<br>31 mm (R)   |
| Maximal axioabaxial width of shaft at constriction                                      | 24.5 mm (L);<br>23 mm (R)   |
| Proximodistal length of dorsal, non-articular surface                                   | 48.8 mm (L);<br>47.9 mm (R) |
| Mediolateral width of dorsal, non-articular surface                                     | 14.9 mm (L);<br>17.9 mm (L) |
| <hr/> <b>Metacarpal III</b> <hr/>                                                       |                             |
| Minimal dorsopalmar depth of the shaft at the axial surface                             | 27 mm (L);<br>27.1 mm (R)   |
| Maximal axioabaxial width of the distal end                                             | 38.6 mm (L)                 |
| Maximal proximodistal length                                                            | 95.7 mm (L)                 |
| Dorsopalmar depth of the proximal end at the proximal surface                           | 56.6 mm (L);<br>55.3 mm (R) |
| Maximal axioabaxial width of the proximal extremity                                     | 68.7 mm (L);<br>67.1 mm (R) |
| Minimal axioabaxial width of the shaft at the dorsal surface                            | 28.1 mm (L);<br>27.5 mm (R) |
| Width of dorsal surface at abaxial proximal projection                                  | 30.3 mm (L);<br>28.8 mm (R) |
| Width of dorsal surface at axial proximal projection                                    | 22 mm (L);<br>22.5 mm (R)   |
| Maximal length of the distal carina ( = Maximal dorsopalmar diameter of the distal end) | 59.2 mm (L)                 |
| <hr/> <b>Metacarpal IV</b> <hr/>                                                        |                             |
| Maximal length                                                                          | 128 mm (L)                  |
| Axioabaxial width of the proximal end                                                   | 45.4 mm (LI)                |
| Maximal axioabaxial width of the distal end                                             | 50 mm (LI)                  |
| Maximal diameter of the distal articular surface                                        | 55 mm (LI)                  |
| Minimal diameter of the shaft                                                           | 23.6 mm (L)                 |
| Maximal diameter of the shaft                                                           | 35 mm (L)                   |
| Dorsopalmar depth of the proximal end                                                   | 55.9 mm (LI)                |
| Dorsopalmar depth of distal end                                                         | 52.6 mm (L)                 |
| Proximodistal length of facet for metacarpal V                                          | 24 mm (L)                   |
| Dorsopalmar depth of facet for metacarpal V                                             | 41.4 mm (L)                 |
| Long axis of distal end in distal view                                                  | 61 mm (L)                   |
| Minimal diameter of distal end in distal view                                           | 41.2 (LI)                   |
| Minimal diameter of the shaft                                                           | 23.6 mm (L)                 |
| Maximal diameter of the shaft                                                           | 35 mm (L)                   |
| Dorsopalmar depth of the proximal end                                                   | 55.9 mm (LI)                |
| Dorsopalmar depth of distal end                                                         | 52.6 mm (L)                 |
| Proximodistal length of facet for metacarpal V                                          | 24 mm (L)                   |
| Dorsopalmar depth of facet for metacarpal V                                             | 41.4 mm (L)                 |

|                                                                                                                                 |              |
|---------------------------------------------------------------------------------------------------------------------------------|--------------|
| Long axis of distal end in distal view                                                                                          | 61 mm (L)    |
| Minimal diameter of distal end in distal view                                                                                   | 41.2 (LI)    |
| <hr/> Metacarpal V <hr/>                                                                                                        |              |
| Maximal preserved proximodistal length                                                                                          | 94.7 mm (L)  |
| Maximal axioabaxial width                                                                                                       | 47.2 mm (LI) |
| Maximal dorsopalmar depth                                                                                                       | 45.2 mm (LI) |
| Minimal axioabaxial width of the body                                                                                           | 34.8 mm (L)  |
| Minimal dorsopalmar depth of the body                                                                                           | 20.4 mm (L)  |
| Maximal axioabaxial width of distal end of body                                                                                 | 50.3 mm (LI) |
| Maximal dorsopalmar width of distal end of body                                                                                 | 39.5 mm (LI) |
| <hr/> Proximal phalanx of digit II <hr/>                                                                                        |              |
| Maximal proximodistal length at the abaxial side                                                                                | 24.6 mm (L)  |
| Maximal proximodistal length at the axial side                                                                                  | 20.1 mm (LI) |
| Maximal dorsopalmar depth of the distal end                                                                                     | 37.4 mm (L)  |
| Maximal axioabaxial width                                                                                                       | 35.9 mm (L)  |
| Maximal dorsopalmar depth                                                                                                       | 48.1 mm (L)  |
| Dorsopalmar depth of abaxial distal condyle                                                                                     | 37 mm (L)    |
| Dorsopalmar depth of axial distal condyle                                                                                       | 34.8 mm (L)  |
| <hr/> Intermediate phalanx of digit II <hr/>                                                                                    |              |
| Maximal dorsopalmar depth of the proximal end                                                                                   | 41.7 mm (L)  |
| Maximal length, perpendicular to and from the line connecting the dorsal and palmar apices of the proximal surface              | 46.4 mm (L)  |
| Maximal dorsopalmar depth of the axial condyle of the distal end, not perpendicular to the maximal length                       | 32.7 mm (L)  |
| Maximal dorsopalmar height of the axial condyle ( = maximal diameter of the distal end), perpendicular to the longitudinal axis | 32.4 mm (L)  |
| Maximal axioabaxial width of the proximal end                                                                                   | 33 mm (L)    |
| Maximal axioabaxial width immediately proximal to the trochlea                                                                  | 29.8 mm (L)  |
| <hr/> Distal phalanx of digit II <hr/>                                                                                          |              |
| Maximal proximodistal length of the bone                                                                                        | 115 mm (LI)  |
| Maximal dorsopalmar depth of sub-ungual plate                                                                                   | 5.3 mm (LI)  |
| Maximal axioabaxial width of the ungual process base                                                                            | 29.5 mm (L)  |
| Maximal dorsopalmar depth of the ungual process base                                                                            | 26.7 mm (L)  |
| <hr/> Proximal phalanx of digit III <hr/>                                                                                       |              |
| Maximal dorsopalmar depth                                                                                                       | 50 mm (RI)   |
| Maximal axioabaxial width                                                                                                       | 34 mm (RI)   |
| Maximal proximodistal length, from the proximal surface to the abaxial condyle                                                  | 22.4 mm (RI) |
| <hr/> Proximal phalanx of digit IV <hr/>                                                                                        |              |
| Maximal dorsopalmar depth                                                                                                       | 39 mm (R)    |

|                                                         |                             |
|---------------------------------------------------------|-----------------------------|
| Maximal axioabaxial width                               | 36.7 mm (R)                 |
| Maximal proximodistal length of the abaxial surface     | 19.5 mm (R)                 |
| Angle between axial sesamoid facet and facet for carina | ca. 140° (R)                |
| Dorsopalmar depth of distal articular surface           | 22 mm (R)                   |
| Mediolateral width of distal articular surface          | 20.8 mm (R)                 |
| <hr/> Proximal phalanx of digit V <hr/>                 |                             |
| Maximal proximodistal length                            | 18.9 mm (R)                 |
| Maximal dorsopalmar depth                               | 28 mm (R)                   |
| Maximal axioabaxial width                               | 30 mm (R)                   |
| <hr/> Abaxial palmar sesamoid of digit III <hr/>        |                             |
| Maximal dorsopalmar depth                               | 14.8 mm (L)                 |
| Maximal length                                          | 28.4 mm (L)                 |
| Maximal axioabaxial width                               | 14.1 mm (L)                 |
| <hr/> Axial palmar sesamoid of digit IV <hr/>           |                             |
| Maximal proximodistal length                            | 26.6 mm (L);<br>27.2 mm (R) |
| Maximal dorsopalmar depth                               | 15.4 mm (R)                 |
| Maximal axioabaxial width                               | 15.4 mm (L);<br>14.9 mm (R) |
| <hr/> Palmar sesamoid <hr/>                             |                             |
| Maximal length                                          | 45.3 mm (L)                 |
| Maximal width, perpendicular to the maximal length      | 36.4 mm (L)                 |
| Maximal thickness                                       | 8.3 mm (L)                  |
