# Supplementary material
Source: publisher figshare collection journal article supplement (https://tandf.figshare.com/articles/dataset/_/3443405)
Supplement: Supplementary file 6 [file 2]

The skeleton of the manus of *Myiodon darwini* Owen (Tardigrada, Mylodontidae) and  
its phylogenetic implications

JOSÉ A. HARO, ADAN A. TAUBER, and JERÓNIMO M. KRAPOVICKAS

Journal of Vertebrate Paleontology

SUPPLEMENTARY DATA 7

## APOMORPHIC HAND SKELETON CHARACTER STATES OF RECOVERED CLADES

### Clade 2:

Character 329: 0→1. Trapezium-metacarpal I with flat proximal facet.

### Clade 4:

Character 321: 0→1. Cuneiform with obliquely concave ulnar facet.

Character 322: 0→1. Cuneiform with separate facets for the ulna and pisiform.

Character 323: 0→1. Distolateral process of cuneiform well developed (convergently acquired in *Megalonyx jeffersoni*).

Character 324: 0→1. Cuneiform proximodistally longer than dorsopalmarly deep.

Character 325: 0→1. Cuneiform proximodistally longer than its ulnar facet is dorsopalmarly deep.

Character 327: 0→1. Cuneiform with weakly developed transverse ridge on the proximal part of the dorsal surface.

Character 348: 0→1. Intermediate phalanx of digit II with ridge on the proximal area largely covered by articular surface.

### Clade 5:

Character 312: 0→1. Humerus without supratrochlear foramen (independently acquired in *Catonyx cuvieri* and *Megatherium americanum*).

Character 313: 0→1. Calcaneal facets fused (reversed in *Thinobadistes segnis*).

Character 314: 0→1. Osteoderms present (reversed in *T. segnis*).

Character 315: 0→1. Scaphoid with separate trapezial and trapezoid facets.

Character 318: 0→1. Lunar with palmarly pinched radial articular surface.

Character 319: 0→1. Dorsal surface of lunar with border corresponding to the unciform facet longer than the medial border.

Character 320: 0→1. Lunar with facets for scaphoid and magnum nearly parallel.

Character 332: 0→1. Unciform with lateral part of the articular surface for cuneiform relatively dorsopalmarly deep.

Character 333: 0→1. Trapezium-metacarpal I with axial process elongate.

Character 335: 0→1. Metacarpal II with facets for magnum and metacarpal III separate.

Character 337: 0→1. At least two separate articular contacts between metacarpal III and magnum.

Character 341: 0→1. Metacarpal III with an oblique distal carina.

Character 342: 0→1. Metacarpal IV with a proximodistally short facet for metacarpal V.

Character 344: 0→1. Metacarpal IV with reduced axial offset in distal articular surface for proximal phalanx.

Character 345: 0→1. Metacarpal IV with dorsopalmarly convex carina in distal articular surface (although unknown for *Pseudopreopotherium confusum*).
